# Supplementary material for: An integrative bioinformatics investigation and experimental validation of chromobox family in diffuse large B-cell lymphoma
Source: Springer Nature journal article supplement (doi:10.1186/s12885-023-11108-6), 2023-07-10
Supplement: MOESM2 [file 25599086]

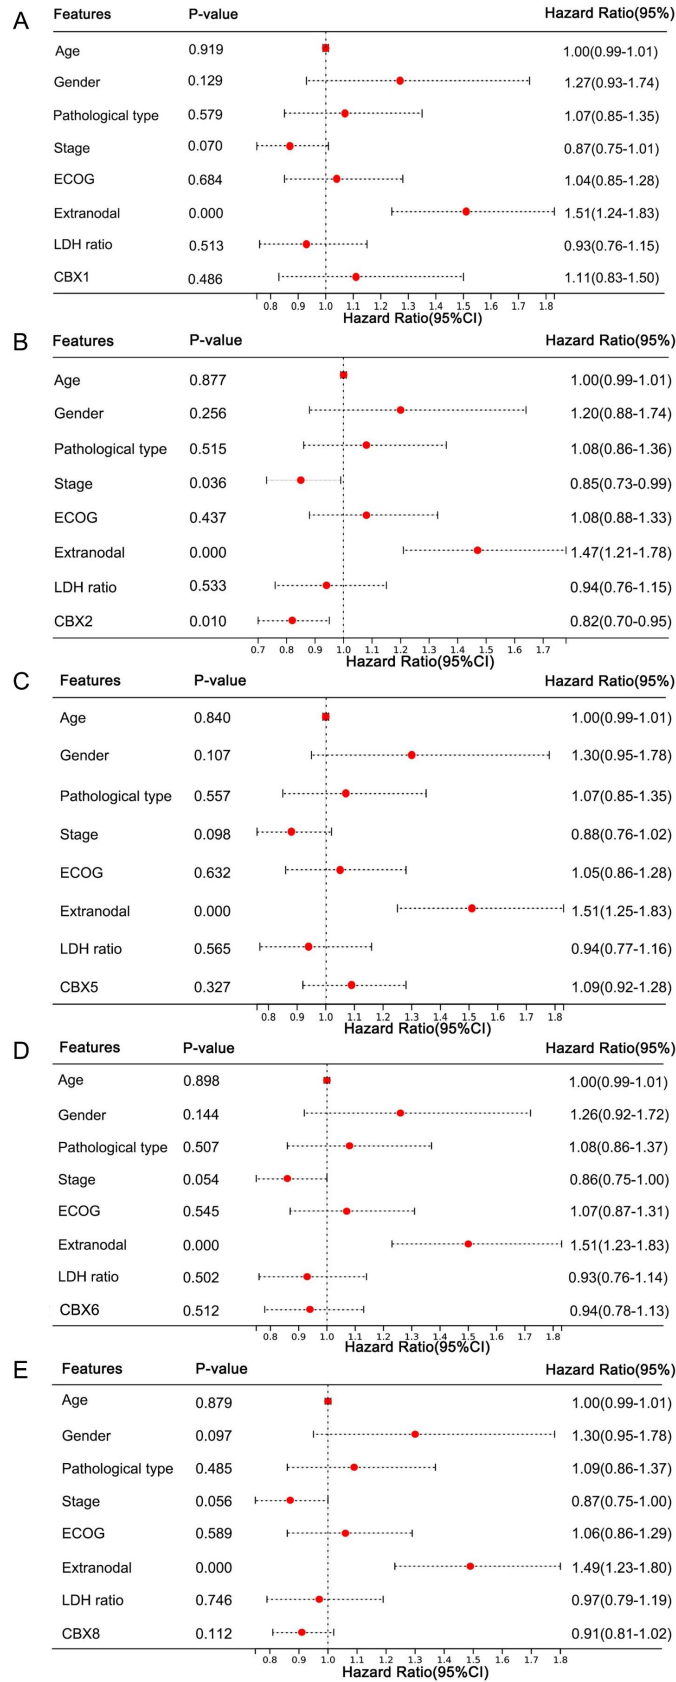

**Figure S2.** Forest plot of the multivariate Cox regression analysis of CBX1/2/5/6/8 in Diffuse Large B-cell Lymphoma (DLBCL). The threshold P-value was defined as 0.05.
